# Supplementary material
Source: PubMed Central journal article supplement (PMC1276042)
Supplement: pnas_0502648102_1.pdf [file pnas_0502648102_1.pdf]

## Supporting Text

In these notes we outline the main steps of the derivation of the results. Let us firstly focus on the limit  $b_0 = d_0 = 0$  when the process reduces to a Galton - Watson branching process. Without loss of generality, we can set  $d_1 = 1$  and  $b_1 = \alpha$  in what follows. Introducing the characteristic function

$$G(x, t) = \sum_{n=0}^{\infty} P_n(t) x^n, \quad (1)$$

the birth and death equation can be transformed in a first-order p.d.e. for  $G(x, t)$

$$\partial_t G(x, t) = (\alpha x^2 + 1 - (\alpha + 1)x) \partial_x G(x, t). \quad (2)$$

This equation can be integrated using, for example, the characteristic method (see ref. 1). Taking as initial condition  $G(x, 0) = x$ , which corresponds to Eq. 4 in the main text, the complete solution is

$$G(x, t) = \frac{(1-x) - (1-\alpha x)e^{(1-\alpha)t}}{\alpha(1-x) - (1-\alpha x)e^{(1-\alpha)t}}, \quad (3)$$

from which we obtain

$$P(0, t) = G(0, t) = \frac{1 - e^{(1-\alpha)t}}{\alpha - e^{(1-\alpha)t}}, \quad (4)$$

and, taking the time derivative of this, we derive Eq. 7 of the main text. It is also easy to see that in the scaling limit, i.e. for  $t^* = 1/(1-\alpha) \gg 1$  and  $t/t^*$  fixed,  $p(t)$  can be cast in the scaling form 8.

In order to deal with the general case, we make a Laplace transform with respect to time of the generating function and define

$$\tilde{G}(x, s) = \int_0^{\infty} dt e^{-st} G(x, t) = \int_0^{\infty} dt e^{-st} \sum_{n=0}^{\infty} P_n(t) x^n. \quad (5)$$

Then the equation of the dynamics becomes

$$\begin{aligned} & [\alpha x^2 + 1 - (\alpha + 1)x] \partial_x \tilde{G}(x, s) + \\ & + \left[ b_0 x + \frac{d_0}{x} - b_0 - d_0 - s \right] [\tilde{G}(x, s) - g_0(s)] = s g_0(s) - x, \end{aligned} \quad (6)$$

where we defined  $g_0(s) = \tilde{G}(0, s)$ , which is the Laplace transform of  $P_0(t)$ , the function we wish to compute. Defining  $F(x, s) = \tilde{G}(x, s) - g_0(s)$  and

using the fact that  $g_0(s)$  does not depend on  $x$ , we obtain the following equation for  $F(x, s)$ :

$$\partial_x F(x, s) + p(x, s)F(x, s) = q(x, s), \quad (7)$$

where

$$\begin{aligned} p(x, s) &= \left[ \frac{d_0}{x} - \frac{b_0 - d_0 \alpha}{1 - \alpha x} - \frac{s}{(1 - \alpha x)(1 - x)} \right] \\ q(x, s) &= \frac{sg_0(s) - x}{(1 - \alpha x)(1 - x)}. \end{aligned} \quad (8)$$

Eq. 7 should be solved with the boundary conditions

$$F(1, s) = \frac{1}{s} - g_0(s) \quad (9)$$

$$F(0, s) = 0. \quad (10)$$

Due to the presence of singularities at  $x = 0$  and  $x = 1$ , some care must be taken when imposing these conditions on the general solution of Eq. 7. Our strategy is that of solving Eq. 7 with a modified initial condition (Eq. 9) at  $x = 1 - \epsilon$

$$F(1 - \epsilon, s) = \frac{1}{s} - g_0(s). \quad (11)$$

Then we will impose condition 10 on the resulting expression, which leaves us with an equation for  $g_0(s)$ . Finally, we shall restore the boundary condition 9 by taking the limit  $\epsilon \rightarrow 0$ . Such an  $\epsilon$ -“regularization” procedure allows us to circumvent the problem of dealing with the singularities at  $x = 1$  of Eq. 7. Notice that, as long as  $\alpha = b_1 \leq 1 = d_1$ , one has  $\lim_{t \rightarrow \infty} P_0(t) = 1$ , i.e. the probability of being asymptotically extinct approaches 1.

The generic form of the solution of Eq. 7 with boundary condition 11 is

$$F(x, s) = e^{\int_x^{1-\epsilon} dx' p(x', s)} \left[ \frac{1}{s} - g_0(s) \right] - \int_x^{1-\epsilon} dx' q(x', s) e^{\int_x^{x'} dx'' p(x'', s)}. \quad (12)$$

The resulting expression is rather complex and it will be considered later on. We shall first specialize to the particular case  $b_0 = d_0 = r$  and  $\alpha = 1$  discussed in the main text, which describes the crossover between the two power law regimes, and then the sub-critical case  $\alpha < 1$ .

For  $b_0 = d_0 = r$  and  $\alpha = 1$ , the coefficients take the simpler form

$$\begin{aligned} p(x, s) &= \frac{r}{x} - \frac{s}{(1-x)^2} \\ q(x, s) &= \frac{sg_0(s) - x}{(1-x)^2}. \end{aligned} \quad (13)$$

Up to the leading order in  $\epsilon$ , the solution is

$$F(x, s) = \frac{e^{-\frac{s}{\epsilon}}(g_0(s) - \frac{1}{s}) - \int_x^{1-\epsilon} dt \frac{sg_0(s)-t}{(1-t)^2} t^r e^{-\frac{s}{1-t}}}{x^r e^{-\frac{s}{1-x}}}. \quad (14)$$

Since the denominator diverges when  $x \rightarrow 0$ , in order to have  $F(0, s) = 0$ , we have to impose that the numerator should be equal to zero. After taking the limit  $\epsilon \rightarrow 0$ , this yields an equation for  $g_0(s)$ , which reads

$$\int_1^x dt \frac{sg_0(s) - t}{(1-t)^2} t^r e^{-\frac{s}{1-t}} = 0. \quad (15)$$

Finally, upon making the substitution  $\frac{1}{1-t} = y$  and rearranging terms, we arrive at our main result, Eq. **11** of the main text with  $N(s, r)$  given by

$$N(s, r) = \int_1^\infty \frac{dy}{y} e^{-sy} (1 - \frac{1}{y})^r. \quad (16)$$

For  $r$  fixed and  $s \ll 1$ , the integral in  $N(s, r)$  is dominated by the region  $y \sim 1/s$  and hence  $N(s, r) \sim -\log s$ ; the application of the Tauberian theorem (see ref. 2) finally demonstrate the  $t^{-2}$  asymptotic behavior of the lifetimes. In order to derive Eq. **12** of the paper, in the limit  $s \ll 1$  with  $rs$  fixed, we make the change of variables  $x = \sqrt{\frac{s}{r}}y$  in Eq. **16**, exponentiate the term  $(1 - 1/y)^r$  in the integral and make a power expansion

$$N(s, r) = \int_{\sqrt{\frac{s}{r}}}^\infty \frac{dx}{x} e^{-\sqrt{rs}(x + \frac{1}{x} - \sqrt{\frac{s}{r}}\frac{1}{x^2} + \dots)}, \quad (17)$$

which, neglecting corrections of order  $\sqrt{s/r}$  leads to Eq. **12** of the main text. When  $rs \gg 1$ , i.e. for  $t \ll r \gg 1$ , we can use the asymptotic expansion for the modified Bessel function,  $K_0$  (see Eq. **12** of the main text) or, more directly, we can estimate the integral with the saddle point method: the maximum of the argument of the exponential occurs at  $x^* = 1$  and, expanding it to second order around  $x^* = 1$ , we find

$$N(s, r) \approx e^{-2\sqrt{rs}} \int_{\sqrt{\frac{s}{r}}}^\infty dx e^{-\sqrt{rs}(x-1)^2} \approx e^{-2\sqrt{rs}} (rs)^{-\frac{1}{4}}. \quad (18)$$

Hence

$$sg_0(s) - 1 = \frac{1}{\partial_s \log N(s, r)} = -\frac{1}{\sqrt{\frac{r}{s}} + \frac{1}{4s}}, \quad (19)$$

which means that for  $s \rightarrow 0$ ,  $sg_0(s) - 1 \sim -\sqrt{s}$  corresponding, according to the Tauberian theorem, to the random walk behavior  $P_0(t) \sim 1/\sqrt{t}$ . The

fact that the scaling variable in the derivation above is  $rs$ , implies that the crossover time should be proportional to  $r$ . Indeed using Eqs.11 and 12 of the main text and the inverse Laplace transform one derives the scaling form

$$p(t) = \frac{1}{t^2} f\left(\frac{t}{r}\right), \quad (20)$$

where the function  $f(x) \sim \sqrt{x}$  for small value of the argument (i.e. when  $x \ll 1$ ) and approaches a constant when  $x$  becomes large.

Finally, let us discuss the sub-critical case  $b_1 < d_1$ . Using exactly the same strategy as for the critical case, we find that the condition  $F(0, s) = 0$  leaves us with the following equation:

$$\int_0^1 dt t^{d_0} (1 - \alpha t)^{b_0/\alpha - d_0 - s/(1-\alpha) - 1} (1 - t)^{1/(1-\alpha) - 1} (sg_0(s) - t) = 0. \quad (21)$$

Now, we substitute  $y = 1 - t$  and solve for  $g_0(s)$

$$sg_0(s) - 1 = - \frac{\int_0^1 dy (1 - y)^{d_0} [1 - \alpha(1 - y)]^{b_0/\alpha - d_0 - s/(1-\alpha) - 1} y^{s/(1-\alpha)}}{\int_0^1 dy (1 - y)^{d_0} [1 - \alpha(1 - y)]^{b_0/\alpha - d_0 - s/(1-\alpha) - 1} y^{s/(1-\alpha) - 1}}. \quad (22)$$

The integral on the numerator is finite when  $s \rightarrow 0$ , whereas that on the denominator has a leading singularity of order  $(1 - \alpha)/s$ . This implies that  $sg_0(s) \simeq -A/[1 + st^*]$ , with  $A$  constant and  $t^* \sim 1/(1 - \alpha)$ , which is exactly the Laplace transform of a distribution of the form

$$p(t) \simeq e^{-t/t^*}.$$

This confirms both the asymptotic exponential decay of  $p(t)$  and the scaling of the cutoff time  $t^* \sim 1/(1 - \alpha)$ .

## References

1. Polyanin, A.D., Zaitsev, V.F. & Moussiaux, A. (2002) *Handbook of First Order Partial Differential Equations* (Taylor & Francis, London).
2. Feller, W. (1966) *An Introduction to Probability Theory and Its Applications* (Wiley, New York), vol. II.
